# Supplementary material for: Investigation of Inflammation and Tissue Patterning in the Gut Using a Spatially Explicit General-Purpose Model of Enteric Tissue (SEGMEnT)
Source: PubMed Central journal article supplement (PMC3967920; doi:10.1371/journal.pcbi.1003507), 2014-03-27
Supplement: pcbi.1003507.s004.pdf [file pcbi.1003507.s004.pdf]

Table S2: Rules for Molecular Interactions in SEGMEnt

| <b>Cytokine</b>      | <b>Effect</b>                                              |
|----------------------|------------------------------------------------------------|
| 1 u Wnt activity     | Produces 1 u Dkk1                                          |
|                      | Allows 1 u $\beta$ -catenin to accumulate in the nucleus   |
|                      | Produces 0.2 u Noggin                                      |
|                      | Produces 0.2 u Wnt receptors, Wnt ligand                   |
| 1 u Dkk1             | Binds to and neutralizes 1 u Wnt receptors                 |
|                      |                                                            |
| 1 u Noggin           | Binds to and neutralizes 1 u BMP molecule                  |
|                      |                                                            |
| 1 u SFRP             | Binds to and neutralizes 1 u Wnt ligand                    |
|                      |                                                            |
| 1 u $\beta$ -catenin | Inhibits production of 0.1 u BMP receptors                 |
|                      | Produces 1 u EphB receptors                                |
|                      | Inhibits the production of 1 u Ephrin B ligand             |
|                      |                                                            |
| 1 u BMP activity     | Prevents 1 u $\beta$ -catenin from accumulating in nucleus |
|                      | Produces 1 u Hh                                            |
|                      | Produces 1 u PTEN                                          |
|                      |                                                            |
| 1 u PTEN             | Inhibits 1 u PI3K activity                                 |
|                      | Inhibits Hh production of SMAD                             |
|                      |                                                            |
| 1 u PI3K             | Activates 1 u Akt                                          |
|                      |                                                            |
| 1 u Hh               | Produces 1 u SFRP                                          |
|                      | Produces 1 u TGF- $\beta$                                  |
|                      |                                                            |
| 1 u TGF- $\beta$     | Produces 1 u SMAD                                          |
|                      |                                                            |
| 1 u SMAD             | Causes immediate release of 0.2 u TGF- $\beta$             |
|                      | Deactivates 1 u Akt                                        |
|                      |                                                            |
| 1 u ROS              | Produces 1 u NF $\kappa$ B                                 |
|                      |                                                            |
| 1 u NF $\kappa$ B    | Produces 1 u I $\kappa$ B                                  |
|                      | Produces 1 u IFN- $\gamma$                                 |
|                      | Produces 1 u TNF- $\alpha$                                 |
|                      | Prevents deactivation of 1 u Akt                           |

|           |                                     |
|-----------|-------------------------------------|
|           |                                     |
| 1 u IκB   | Prevents production of 0.75 u NFκB  |
|           |                                     |
| 1 u DAMP  | Initiates production of 3 u NFκB    |
|           |                                     |
| 1 u IL10  | Produces 1 u JAK                    |
|           | Inhibits production of 0.33 u TNF-α |
|           |                                     |
| 1 u IL15  | Produces 1 u JAK                    |
|           | Produces 1 u IFN-γ                  |
|           |                                     |
| 1 u IL13  | Produces 1 u JAK                    |
|           |                                     |
| 1 u IL6   | Produces 1 u JAK                    |
|           |                                     |
| 1 u TNF-α | Produces 1 u RIP                    |
|           | Produces 1 u Dkk1                   |
|           | Produces 1 u PI3K activity          |
|           | Produces 1 u IL10                   |
|           | Deactivates 1 u Akt                 |
|           |                                     |
| 1 u RIP   | Inhibits production of 1 u NFκB     |
|           |                                     |
| 1 u JAK   | Initiates production of 1 u STAT3   |
|           |                                     |
| 1 u IFN-γ | Protects 1 u Akt from deactivation  |
|           |                                     |
| 1 u STAT3 | Produces 2 u PTEN                   |
|           | Deactivates 1 u Akt                 |
