# Supplementary material for: Investigation of Inflammation and Tissue Patterning in the Gut Using a Spatially Explicit General-Purpose Model of Enteric Tissue (SEGMEnT)
Source: PLOS journal article supplement (doi:10.1371/journal.pcbi.1003507), 2014-03-27
Supplement: S3 (10.1371/journal.pcbi.1003507.s003) [file journal.pcbi.1003507.s003.pdf › journal.pcbi.1003507.s003.pdf]

Table S1: Primary Molecular Components included in SEGMEiT

| Signal                | Primary Function                                                                                                                                                                                                   | Ref.             |
|-----------------------|--------------------------------------------------------------------------------------------------------------------------------------------------------------------------------------------------------------------|------------------|
| Wnt- $\beta$ -catenin | Deactivates $\beta$ -catenin destruction complex; maintain cells in undifferentiated state; direct migratory paths (via EphB receptor - Ephrin B ligand signaling); increase cellular proliferation.               | [32-35][77]      |
| Dkk1                  | Inhibits Wnt signaling by binding to and neutralizing Wnt receptors; balance Wnt self-stimulation to limit the size of the proliferative compartment of the crypt.                                                 | [79, 80]         |
| Noggin                | Binds to and neutralizes BMP molecules; protects the proliferative compartment from BMP signaling.                                                                                                                 | [32, 81]         |
| BMP                   | Inhibits nuclear accumulation of $\beta$ -catenin; up-regulated differentiation; limits crypt, villus growth.                                                                                                      | [32, 38, 81, 82] |
| Hedgehog              | Controls villus height through regulation of apoptosis; controls strength of GEC adhesion to villus; loss of Akt initiates signaling cascade leading to anoikis.                                                   | [43, 44, 83]     |
| TGF- $\beta$ -SMAD3   | Increases apoptosis through up-regulation of SMAD3, an Akt inhibitor.                                                                                                                                              | [84-86]          |
| Akt                   | Controls villus height through regulation of apoptosis; controls strength of GEC adhesion to villus; loss of Akt initiates signaling cascade leading to anoikis.                                                   | [32, 79, 87-90]  |
| PTEN/PI3K             | Interrupts PI3K activity by converting PIP3 to PIP2; up-regulated by inflammation, down-regulates Hh (putative).                                                                                                   | [32, 79, 87, 88] |
| NF $\kappa$ B         | Anti-inflammatory response which inhibits apoptosis and necrosis. NF $\kappa$ B displays self-regulation through I $\kappa$ B.                                                                                     | [58][57, 91, 92] |
| TNF- $\alpha$         | Induces apoptosis and necrosis (if combined with RIP1); secreted primarily by inflammatory cells; up-regulates NF $\kappa$ B to prevent excess inflammation; inhibits proliferation through up-regulation of Dkk1. | [58-60, 93]      |
| RIP                   | Induces cell death, but also up-regulates the expression of NF $\kappa$ B; modulates TNF functionality from apoptosis to necrosis.                                                                                 | [94-97][51]      |

|               |                                                                                                                         |          |
|---------------|-------------------------------------------------------------------------------------------------------------------------|----------|
| JAK/STAT3     | Various IL's up-regulate JAK, which activates STAT3. STAT3 leads to apoptosis in all cell types represented in SEGMEnt. | [61, 62] |
| IFN- $\gamma$ | Prevents apoptosis through up-regulation of PI3K activity.                                                              | [98]     |
| ROS           | Induces cell death through necrosis; primarily secreted by neutrophils to assist in phagocytosis of necrotic debris.    | [57, 91] |
