# Supplementary material for: Investigation of Inflammation and Tissue Patterning in the Gut Using a Spatially Explicit General-Purpose Model of Enteric Tissue (SEGMEnT)
Source: PLOS journal article supplement (doi:10.1371/journal.pcbi.1003507), 2014-03-27
Supplement: S5 (10.1371/journal.pcbi.1003507.s005) [file journal.pcbi.1003507.s005.pdf › journal.pcbi.1003507.s005.pdf]

Table S3: Physical characteristics, published and derived time delays, and model-implemented time delays for signaling events involving molecular components included in SEGMENT

| <b>Protein</b> | <b>AA length</b> | <b>Num. Introns</b> | <b>Time Delay (min)</b> | <b>Time Delay (max)</b> | <b>Model Delay</b> |
|----------------|------------------|---------------------|-------------------------|-------------------------|--------------------|
| Wnt            | 365              | 3                   | 322                     | 517                     | 400                |
| Dkk1           | 266              | 3                   | 321                     | 516                     | 450                |
| Nog            | 232              | 0                   | 307                     | 487                     | 400                |
| SHh            | 462              | 2                   | 18                      | 28                      | 30                 |
| Ihh            | 411              | 2                   | 17                      | 27                      | 30                 |
| TGF- $\beta$   | 390              | 6                   | 37                      | 67                      | 45                 |
| Smad3          | 425              | 6                   | 38                      | 68                      | 45                 |
| TNF- $\alpha$  | 233              | 2                   | 16                      | 26                      | 30                 |
| JAK            | 1154             | 24                  | 128                     | 248                     | 150                |
| RIP            | 671              | 9                   | 52                      | 97                      | 60                 |
| NF- $\kappa$ B | 415              | 8                   | 46                      | 86                      | 60                 |
| IFN- $\gamma$  | 166              | 3                   | 20                      | 35                      | 30                 |
| Stat3          | 770              | 23                  | 122                     | 237                     | 150                |
| JNK            | 427              | 10                  | 56                      | 106                     | 75                 |
| IL6            | 212              | 4                   | 26                      | 46                      | 30                 |
| IL10           | 178              | 4                   | 25                      | 45                      | 30                 |
| IL13           | 146              | 3                   | 20                      | 35                      | 30                 |
| IL15           | 162              | 9                   | 50                      | 95                      | 60                 |
