# Supplementary material for: Investigation of Inflammation and Tissue Patterning in the Gut Using a Spatially Explicit General-Purpose Model of Enteric Tissue (SEGMEnT)
Source: PLOS journal article supplement (doi:10.1371/journal.pcbi.1003507), 2014-03-27
Supplement: S6 (10.1371/journal.pcbi.1003507.s006) [file journal.pcbi.1003507.s006.pdf › journal.pcbi.1003507.s006.pdf]

Table S4: Additional Features and Capabilities to be added to SEGMEnt

| <b>Feature</b>                   | <b>Function</b>                                                                                                                      |
|----------------------------------|--------------------------------------------------------------------------------------------------------------------------------------|
| Goblet Cells                     | More accurately reflect histology of mucosa; simulate maintenance of mucus layer; host-microbe interactions                          |
| Metabolism                       | Host-microbe dynamics involved in obesity [59-61], Type II Diabetes; simulations of disease states such as Environmental Enteropathy |
| Microbiome                       | Important to health, disease [64,65]; simulate host-microbe interactions; interplay between inflammation and microbiome              |
| Enhanced Immunity                | Implement advanced immunity controls to more accurately depict chronic inflammation                                                  |
| High Performance Computing (HPC) | Parallelize the model in order to represent larger, clinically realistic sections of tissue                                          |
